# Supplementary material for: Detection of hypomimia in patients with Parkinson’s disease via smile videos
Source: PubMed Central journal article supplement — Ann Transl Med. 2021 Aug;9(16):1307. doi: 10.21037/atm-21-3457 (PMC8422154; doi:10.21037/atm-21-3457), 2021-08
Supplement: atm-09-16-1307-coif.pdf [file atm-09-16-1307-coif.pdf]

## ICMJE DISCLOSURE FORM

Date: 2021.7.1  
 Your Name: Ge Su  
 Manuscript Title: Detection of hypomimia in patients with Parkinson's disease via smile videos  
 Manuscript number (if known): \_\_\_\_\_

In the interest of transparency, we ask you to disclose all relationships/activities/interests listed below that are related to the content of your manuscript. "Related" means any relation with for-profit or not-for-profit third parties whose interests may be affected by the content of the manuscript. Disclosure represents a commitment to transparency and does not necessarily indicate a bias. If you are in doubt about whether to list a relationship/activity/interest, it is preferable that you do so.

The following questions apply to the author's relationships/activities/interests as they relate to the current manuscript only.

The author's relationships/activities/interests should be defined broadly. For example, if your manuscript pertains to the epidemiology of hypertension, you should declare all relationships with manufacturers of antihypertensive medication, even if that medication is not mentioned in the manuscript.

In item #1 below, report all support for the work reported in this manuscript without time limit. For all other items, the time frame for disclosure is the past 36 months.

|                                                           |                                                                                                                                                                                | Name all entities with whom you have this relationship or indicate none (add rows as needed) | Specifications/Comments (e.g., if payments were made to you or to your institution) |
|-----------------------------------------------------------|--------------------------------------------------------------------------------------------------------------------------------------------------------------------------------|----------------------------------------------------------------------------------------------|-------------------------------------------------------------------------------------|
| <b>Time frame: Since the initial planning of the work</b> |                                                                                                                                                                                |                                                                                              |                                                                                     |
| 1                                                         | All support for the present manuscript (e.g., funding, provision of study materials, medical writing, article processing charges, etc.)<br><b>No time limit for this item.</b> | National Key Research and Development Program of China (No. 2017YFB1400603)                  | funding                                                                             |
|                                                           |                                                                                                                                                                                | National Natural Science Foundation of China (Grant No. 61825205, No. 61772459)              | funding                                                                             |
|                                                           |                                                                                                                                                                                | National Science and Technology Major Project of China (No.50-D36B02-9002-16/19)             | funding                                                                             |
|                                                           |                                                                                                                                                                                | Second Affiliated Hospital, Zhejiang University School of Medicine                           | provision of study materials                                                        |
|                                                           |                                                                                                                                                                                |                                                                                              |                                                                                     |
|                                                           |                                                                                                                                                                                |                                                                                              |                                                                                     |
|                                                           |                                                                                                                                                                                |                                                                                              |                                                                                     |

**Time frame: past 36 months**

|    |                                                                                                              |                                                                                                          |  |
|----|--------------------------------------------------------------------------------------------------------------|----------------------------------------------------------------------------------------------------------|--|
| 2  | Grants or contracts from any entity (if not indicated in item #1 above).                                     | <u>  </u> <b>X</b> <u>  </u> None                                                                        |  |
| 3  | Royalties or licenses                                                                                        | <u>  </u> <b>X</b> <u>  </u> None                                                                        |  |
| 4  | Consulting fees                                                                                              | <u>  </u> <b>X</b> <u>  </u> None                                                                        |  |
| 5  | Payment or honoraria for lectures, presentations, speakers bureaus, manuscript writing or educational events | <u>  </u> <b>X</b> <u>  </u> None                                                                        |  |
| 6  | Payment for expert testimony                                                                                 | <u>  </u> <b>X</b> <u>  </u> None                                                                        |  |
| 7  | Support for attending meetings and/or travel                                                                 | A Construction Method for Detecting Facial Bradykinesia based on Geometric Features and Texture Features |  |
| 8  | Patents planned, issued or pending                                                                           | <u>  </u> <b>X</b> <u>  </u> None                                                                        |  |
| 9  | Participation on a Data Safety Monitoring Board or Advisory Board                                            | <u>  </u> <b>X</b> <u>  </u> None                                                                        |  |
| 10 | Leadership or fiduciary role in other board, society, committee or advocacy group, paid or unpaid            | <u>  </u> <b>X</b> <u>  </u> None                                                                        |  |
| 11 | Stock or stock options                                                                                       | <u>  </u> <b>X</b> <u>  </u> None                                                                        |  |
| 12 | Receipt of equipment, materials, drugs, medical writing, gifts or other services                             | <u>  </u> <b>X</b> <u>  </u> None                                                                        |  |
| 13 | Other financial or non-financial interests                                                                   | <u>  </u> <b>X</b> <u>  </u> None                                                                        |  |

**Please summarize the above conflict of interest in the following box:**

This work was supported by the National Key Research and Development Program of China (No. 2017YFB1400603), the National Natural Science Foundation of China (Grant No. 61825205, No. 61772459), and the National Science and Technology Major Project of China (No.50-D36B02-9002-16/19).  
Patents pending: A Construction Method for Detecting Facial Bradykinesia based on Geometric Features and Texture Features  
Provision of study materials: Second Affiliated Hospital, Zhejiang University School of Medicine

**Please place an "X" next to the following statement to indicate your agreement:**

  X   I certify that I have answered every question and have not altered the wording of any of the questions on this form.

## ICMJE DISCLOSURE FORM

Date: 2021.7.1  
 Your Name: Bo Lin  
 Manuscript Title: Detection of hypomimia in patients with Parkinson's disease via smile videos  
 Manuscript number (if known): \_\_\_\_\_

In the interest of transparency, we ask you to disclose all relationships/activities/interests listed below that are related to the content of your manuscript. "Related" means any relation with for-profit or not-for-profit third parties whose interests may be affected by the content of the manuscript. Disclosure represents a commitment to transparency and does not necessarily indicate a bias. If you are in doubt about whether to list a relationship/activity/interest, it is preferable that you do so.

The following questions apply to the author's relationships/activities/interests as they relate to the current manuscript only.

The author's relationships/activities/interests should be defined broadly. For example, if your manuscript pertains to the epidemiology of hypertension, you should declare all relationships with manufacturers of antihypertensive medication, even if that medication is not mentioned in the manuscript.

In item #1 below, report all support for the work reported in this manuscript without time limit. For all other items, the time frame for disclosure is the past 36 months.

|                                                           |                                                                                                                                                                                | Name all entities with whom you have this relationship or indicate none (add rows as needed) | Specifications/Comments (e.g., if payments were made to you or to your institution) |
|-----------------------------------------------------------|--------------------------------------------------------------------------------------------------------------------------------------------------------------------------------|----------------------------------------------------------------------------------------------|-------------------------------------------------------------------------------------|
| <b>Time frame: Since the initial planning of the work</b> |                                                                                                                                                                                |                                                                                              |                                                                                     |
| 1                                                         | All support for the present manuscript (e.g., funding, provision of study materials, medical writing, article processing charges, etc.)<br><b>No time limit for this item.</b> | National Key Research and Development Program of China (No. 2017YFB1400603)                  | funding                                                                             |
|                                                           |                                                                                                                                                                                | National Natural Science Foundation of China (Grant No. 61825205, No. 61772459)              | funding                                                                             |
|                                                           |                                                                                                                                                                                | National Science and Technology Major Project of China (No.50-D36B02-9002-16/19)             | funding                                                                             |
|                                                           |                                                                                                                                                                                | Second Affiliated Hospital, Zhejiang University School of Medicine                           | provision of study materials                                                        |
|                                                           |                                                                                                                                                                                |                                                                                              |                                                                                     |
|                                                           |                                                                                                                                                                                |                                                                                              |                                                                                     |
|                                                           |                                                                                                                                                                                |                                                                                              |                                                                                     |

**Time frame: past 36 months**

|    |                                                                                                              |                                                                                                          |  |
|----|--------------------------------------------------------------------------------------------------------------|----------------------------------------------------------------------------------------------------------|--|
| 2  | Grants or contracts from any entity (if not indicated in item #1 above).                                     | <u>  X  </u> None                                                                                        |  |
| 3  | Royalties or licenses                                                                                        | <u>  X  </u> None                                                                                        |  |
| 4  | Consulting fees                                                                                              | <u>  X  </u> None                                                                                        |  |
| 5  | Payment or honoraria for lectures, presentations, speakers bureaus, manuscript writing or educational events | <u>  X  </u> None                                                                                        |  |
| 6  | Payment for expert testimony                                                                                 | <u>  X  </u> None                                                                                        |  |
| 7  | Support for attending meetings and/or travel                                                                 | A Construction Method for Detecting Facial Bradykinesia based on Geometric Features and Texture Features |  |
| 8  | Patents planned, issued or pending                                                                           | <u>  X  </u> None                                                                                        |  |
| 9  | Participation on a Data Safety Monitoring Board or Advisory Board                                            | <u>  X  </u> None                                                                                        |  |
| 10 | Leadership or fiduciary role in other board, society, committee or advocacy group, paid or unpaid            | <u>  X  </u> None                                                                                        |  |
| 11 | Stock or stock options                                                                                       | <u>  X  </u> None                                                                                        |  |
| 12 | Receipt of equipment, materials, drugs, medical writing, gifts or other services                             | <u>  X  </u> None                                                                                        |  |
| 13 | Other financial or non-financial interests                                                                   | <u>  X  </u> None                                                                                        |  |

**Please summarize the above conflict of interest in the following box:**

This work was supported by the National Key Research and Development Program of China (No. 2017YFB1400603), the National Natural Science Foundation of China (Grant No. 61825205, No. 61772459), and the National Science and Technology Major Project of China (No.50-D36B02-9002-16/19).  
Patents pending: A Construction Method for Detecting Facial Bradykinesia based on Geometric Features and Texture Features  
Provision of study materials: Second Affiliated Hospital, Zhejiang University School of Medicine

**Please place an "X" next to the following statement to indicate your agreement:**

**X** I certify that I have answered every question and have not altered the wording of any of the questions on this form.

## ICMJE DISCLOSURE FORM

Date: 2021.7.1  
 Your Name: Jianwei Yin  
 Manuscript Title: Detection of hypomimia in patients with Parkinson’s disease via smile videos  
 Manuscript number (if known): \_\_\_\_\_

In the interest of transparency, we ask you to disclose all relationships/activities/interests listed below that are related to the content of your manuscript. “Related” means any relation with for-profit or not-for-profit third parties whose interests may be affected by the content of the manuscript. Disclosure represents a commitment to transparency and does not necessarily indicate a bias. If you are in doubt about whether to list a relationship/activity/interest, it is preferable that you do so.

The following questions apply to the author’s relationships/activities/interests as they relate to the current manuscript only.

The author’s relationships/activities/interests should be defined broadly. For example, if your manuscript pertains to the epidemiology of hypertension, you should declare all relationships with manufacturers of antihypertensive medication, even if that medication is not mentioned in the manuscript.

In item #1 below, report all support for the work reported in this manuscript without time limit. For all other items, the time frame for disclosure is the past 36 months.

|                                                           |                                                                                                                                                                                | Name all entities with whom you have this relationship or indicate none (add rows as needed) | Specifications/Comments (e.g., if payments were made to you or to your institution) |
|-----------------------------------------------------------|--------------------------------------------------------------------------------------------------------------------------------------------------------------------------------|----------------------------------------------------------------------------------------------|-------------------------------------------------------------------------------------|
| <b>Time frame: Since the initial planning of the work</b> |                                                                                                                                                                                |                                                                                              |                                                                                     |
| 1                                                         | All support for the present manuscript (e.g., funding, provision of study materials, medical writing, article processing charges, etc.)<br><b>No time limit for this item.</b> | National Key Research and Development Program of China (No. 2017YFB1400603)                  | funding                                                                             |
|                                                           |                                                                                                                                                                                | National Natural Science Foundation of China (Grant No. 61825205, No. 61772459)              | funding                                                                             |
|                                                           |                                                                                                                                                                                | National Science and Technology Major Project of China (No.50-D36B02-9002-16/19)             | funding                                                                             |
|                                                           |                                                                                                                                                                                | Second Affiliated Hospital, Zhejiang University School of Medicine                           | provision of study materials                                                        |
|                                                           |                                                                                                                                                                                |                                                                                              |                                                                                     |
|                                                           |                                                                                                                                                                                |                                                                                              |                                                                                     |
|                                                           |                                                                                                                                                                                |                                                                                              |                                                                                     |

**Time frame: past 36 months**

|    |                                                                                                              |                                                                                                          |  |
|----|--------------------------------------------------------------------------------------------------------------|----------------------------------------------------------------------------------------------------------|--|
| 2  | Grants or contracts from any entity (if not indicated in item #1 above).                                     | <u>  </u> <b>X</b> <u>  </u> None                                                                        |  |
| 3  | Royalties or licenses                                                                                        | <u>  </u> <b>X</b> <u>  </u> None                                                                        |  |
| 4  | Consulting fees                                                                                              | <u>  </u> <b>X</b> <u>  </u> None                                                                        |  |
| 5  | Payment or honoraria for lectures, presentations, speakers bureaus, manuscript writing or educational events | <u>  </u> <b>X</b> <u>  </u> None                                                                        |  |
| 6  | Payment for expert testimony                                                                                 | <u>  </u> <b>X</b> <u>  </u> None                                                                        |  |
| 7  | Support for attending meetings and/or travel                                                                 | A Construction Method for Detecting Facial Bradykinesia based on Geometric Features and Texture Features |  |
| 8  | Patents planned, issued or pending                                                                           | <u>  </u> <b>X</b> <u>  </u> None                                                                        |  |
| 9  | Participation on a Data Safety Monitoring Board or Advisory Board                                            | <u>  </u> <b>X</b> <u>  </u> None                                                                        |  |
| 10 | Leadership or fiduciary role in other board, society, committee or advocacy group, paid or unpaid            | <u>  </u> <b>X</b> <u>  </u> None                                                                        |  |
| 11 | Stock or stock options                                                                                       | <u>  </u> <b>X</b> <u>  </u> None                                                                        |  |
| 12 | Receipt of equipment, materials, drugs, medical writing, gifts or other services                             | <u>  </u> <b>X</b> <u>  </u> None                                                                        |  |
| 13 | Other financial or non-financial interests                                                                   | <u>  </u> <b>X</b> <u>  </u> None                                                                        |  |



**Please summarize the above conflict of interest in the following box:**

This work was supported by the National Key Research and Development Program of China (No. 2017YFB1400603), the National Natural Science Foundation of China (Grant No. 61825205, No. 61772459), and the National Science and Technology Major Project of China (No.50-D36B02-9002-16/19).  
Patents pending: A Construction Method for Detecting Facial Bradykinesia based on Geometric Features and Texture Features  
Provision of study materials: Second Affiliated Hospital, Zhejiang University School of Medicine

**Please place an "X" next to the following statement to indicate your agreement:**

  X   I certify that I have answered every question and have not altered the wording of any of the questions on this form.

## ICMJE DISCLOSURE FORM

Date: 2021.7.1  
 Your Name: Wei Luo  
 Manuscript Title: Detection of hypomimia in patients with Parkinson's disease via smile videos  
 Manuscript number (if known): \_\_\_\_\_

In the interest of transparency, we ask you to disclose all relationships/activities/interests listed below that are related to the content of your manuscript. "Related" means any relation with for-profit or not-for-profit third parties whose interests may be affected by the content of the manuscript. Disclosure represents a commitment to transparency and does not necessarily indicate a bias. If you are in doubt about whether to list a relationship/activity/interest, it is preferable that you do so.

The following questions apply to the author's relationships/activities/interests as they relate to the current manuscript only.

The author's relationships/activities/interests should be defined broadly. For example, if your manuscript pertains to the epidemiology of hypertension, you should declare all relationships with manufacturers of antihypertensive medication, even if that medication is not mentioned in the manuscript.

In item #1 below, report all support for the work reported in this manuscript without time limit. For all other items, the time frame for disclosure is the past 36 months.

|                                                           |                                                                                                                                                                                | Name all entities with whom you have this relationship or indicate none (add rows as needed) | Specifications/Comments (e.g., if payments were made to you or to your institution) |
|-----------------------------------------------------------|--------------------------------------------------------------------------------------------------------------------------------------------------------------------------------|----------------------------------------------------------------------------------------------|-------------------------------------------------------------------------------------|
| <b>Time frame: Since the initial planning of the work</b> |                                                                                                                                                                                |                                                                                              |                                                                                     |
| 1                                                         | All support for the present manuscript (e.g., funding, provision of study materials, medical writing, article processing charges, etc.)<br><b>No time limit for this item.</b> | Second Affiliated Hospital, Zhejiang University School of Medicine                           | provision of study materials                                                        |
|                                                           |                                                                                                                                                                                |                                                                                              |                                                                                     |
|                                                           |                                                                                                                                                                                |                                                                                              |                                                                                     |
|                                                           |                                                                                                                                                                                |                                                                                              |                                                                                     |
|                                                           |                                                                                                                                                                                |                                                                                              |                                                                                     |
|                                                           |                                                                                                                                                                                |                                                                                              |                                                                                     |
| <b>Time frame: past 36 months</b>                         |                                                                                                                                                                                |                                                                                              |                                                                                     |
| 2                                                         | Grants or contracts from any entity (if not indicated in item #1 above).                                                                                                       | <u> X </u> None                                                                              |                                                                                     |
|                                                           |                                                                                                                                                                                |                                                                                              |                                                                                     |
| 3                                                         | Royalties or licenses                                                                                                                                                          | <u> X </u> None                                                                              |                                                                                     |
|                                                           |                                                                                                                                                                                |                                                                                              |                                                                                     |
| 4                                                         | Consulting fees                                                                                                                                                                | <u> X </u> None                                                                              |                                                                                     |

|    |                                                                                                              |                                                                                                          |  |
|----|--------------------------------------------------------------------------------------------------------------|----------------------------------------------------------------------------------------------------------|--|
|    |                                                                                                              |                                                                                                          |  |
| 5  | Payment or honoraria for lectures, presentations, speakers bureaus, manuscript writing or educational events | <input checked="" type="checkbox"/> None                                                                 |  |
| 6  | Payment for expert testimony                                                                                 | <input checked="" type="checkbox"/> None                                                                 |  |
| 7  | Support for attending meetings and/or travel                                                                 | A Construction Method for Detecting Facial Bradykinesia based on Geometric Features and Texture Features |  |
| 8  | Patents planned, issued or pending                                                                           | <input checked="" type="checkbox"/> None                                                                 |  |
| 9  | Participation on a Data Safety Monitoring Board or Advisory Board                                            | <input checked="" type="checkbox"/> None                                                                 |  |
| 10 | Leadership or fiduciary role in other board, society, committee or advocacy group, paid or unpaid            | <input checked="" type="checkbox"/> None                                                                 |  |
| 11 | Stock or stock options                                                                                       | <input checked="" type="checkbox"/> None                                                                 |  |
| 12 | Receipt of equipment, materials, drugs, medical writing, gifts or other services                             | <input checked="" type="checkbox"/> None                                                                 |  |
| 13 | Other financial or non-financial interests                                                                   | <input checked="" type="checkbox"/> None                                                                 |  |

**Please summarize the above conflict of interest in the following box:**

Patents pending: A Construction Method for Detecting Facial Bradykinesia based on Geometric Features and Texture Features  
Provision of study materials: Second Affiliated Hospital, Zhejiang University School of Medicine

Please place an "X" next to the following statement to indicate your agreement:

X I certify that I have answered every question and have not altered the wording of any of the questions on this form.

## ICMJE DISCLOSURE FORM

Date: 2021.7.1  
 Your Name: Renjun Xu  
 Manuscript Title: Detection of hypomimia in patients with Parkinson's disease via smile videos  
 Manuscript number (if known): \_\_\_\_\_

In the interest of transparency, we ask you to disclose all relationships/activities/interests listed below that are related to the content of your manuscript. "Related" means any relation with for-profit or not-for-profit third parties whose interests may be affected by the content of the manuscript. Disclosure represents a commitment to transparency and does not necessarily indicate a bias. If you are in doubt about whether to list a relationship/activity/interest, it is preferable that you do so.

The following questions apply to the author's relationships/activities/interests as they relate to the current manuscript only.

The author's relationships/activities/interests should be defined broadly. For example, if your manuscript pertains to the epidemiology of hypertension, you should declare all relationships with manufacturers of antihypertensive medication, even if that medication is not mentioned in the manuscript.

In item #1 below, report all support for the work reported in this manuscript without time limit. For all other items, the time frame for disclosure is the past 36 months.

|                                                           |                                                                                                                                                                                | Name all entities with whom you have this relationship or indicate none (add rows as needed) | Specifications/Comments (e.g., if payments were made to you or to your institution) |
|-----------------------------------------------------------|--------------------------------------------------------------------------------------------------------------------------------------------------------------------------------|----------------------------------------------------------------------------------------------|-------------------------------------------------------------------------------------|
| <b>Time frame: Since the initial planning of the work</b> |                                                                                                                                                                                |                                                                                              |                                                                                     |
| 1                                                         | All support for the present manuscript (e.g., funding, provision of study materials, medical writing, article processing charges, etc.)<br><b>No time limit for this item.</b> | <u>X</u> None                                                                                |                                                                                     |
|                                                           |                                                                                                                                                                                |                                                                                              |                                                                                     |
|                                                           |                                                                                                                                                                                |                                                                                              |                                                                                     |
|                                                           |                                                                                                                                                                                |                                                                                              |                                                                                     |
|                                                           |                                                                                                                                                                                |                                                                                              |                                                                                     |
|                                                           |                                                                                                                                                                                |                                                                                              |                                                                                     |
|                                                           |                                                                                                                                                                                |                                                                                              |                                                                                     |
| <b>Time frame: past 36 months</b>                         |                                                                                                                                                                                |                                                                                              |                                                                                     |
| 2                                                         | Grants or contracts from any entity (if not indicated in item #1 above).                                                                                                       | <u>X</u> None                                                                                |                                                                                     |
|                                                           |                                                                                                                                                                                |                                                                                              |                                                                                     |
| 3                                                         | Royalties or licenses                                                                                                                                                          | <u>X</u> None                                                                                |                                                                                     |
|                                                           |                                                                                                                                                                                |                                                                                              |                                                                                     |
| 4                                                         | Consulting fees                                                                                                                                                                | <u>X</u> None                                                                                |                                                                                     |
|                                                           |                                                                                                                                                                                |                                                                                              |                                                                                     |
|                                                           |                                                                                                                                                                                |                                                                                              |                                                                                     |

|    |                                                                                                              |                 |  |
|----|--------------------------------------------------------------------------------------------------------------|-----------------|--|
| 5  | Payment or honoraria for lectures, presentations, speakers bureaus, manuscript writing or educational events | <u> X </u> None |  |
|    |                                                                                                              |                 |  |
|    |                                                                                                              |                 |  |
| 6  | Payment for expert testimony                                                                                 | <u> X </u> None |  |
|    |                                                                                                              |                 |  |
|    |                                                                                                              |                 |  |
| 7  | Support for attending meetings and/or travel                                                                 | <u> X </u> None |  |
|    |                                                                                                              |                 |  |
|    |                                                                                                              |                 |  |
| 8  | Patents planned, issued or pending                                                                           | <u> X </u> None |  |
|    |                                                                                                              |                 |  |
|    |                                                                                                              |                 |  |
| 9  | Participation on a Data Safety Monitoring Board or Advisory Board                                            | <u> X </u> None |  |
|    |                                                                                                              |                 |  |
|    |                                                                                                              |                 |  |
| 10 | Leadership or fiduciary role in other board, society, committee or advocacy group, paid or unpaid            | <u> X </u> None |  |
|    |                                                                                                              |                 |  |
|    |                                                                                                              |                 |  |
| 11 | Stock or stock options                                                                                       | <u> X </u> None |  |
|    |                                                                                                              |                 |  |
|    |                                                                                                              |                 |  |
| 12 | Receipt of equipment, materials, drugs, medical writing, gifts or other services                             | <u> X </u> None |  |
|    |                                                                                                              |                 |  |
|    |                                                                                                              |                 |  |
| 13 | Other financial or non-financial interests                                                                   | <u> X </u> None |  |
|    |                                                                                                              |                 |  |
|    |                                                                                                              |                 |  |

Please summarize the above conflict of interest in the following box:

None.

Please place an "X" next to the following statement to indicate your agreement:

X  I certify that I have answered every question and have not altered the wording of any of the questions on this form.

## ICMJE DISCLOSURE FORM

Date: 2021.7.1  
 Your Name: Jie Xu  
 Manuscript Title: Detection of hypomimia in patients with Parkinson's disease via smile videos  
 Manuscript number (if known): \_\_\_\_\_

In the interest of transparency, we ask you to disclose all relationships/activities/interests listed below that are related to the content of your manuscript. "Related" means any relation with for-profit or not-for-profit third parties whose interests may be affected by the content of the manuscript. Disclosure represents a commitment to transparency and does not necessarily indicate a bias. If you are in doubt about whether to list a relationship/activity/interest, it is preferable that you do so.

The following questions apply to the author's relationships/activities/interests as they relate to the current manuscript only.

The author's relationships/activities/interests should be defined broadly. For example, if your manuscript pertains to the epidemiology of hypertension, you should declare all relationships with manufacturers of antihypertensive medication, even if that medication is not mentioned in the manuscript.

In item #1 below, report all support for the work reported in this manuscript without time limit. For all other items, the time frame for disclosure is the past 36 months.

|                                                           |                                                                                                                                                                                | Name all entities with whom you have this relationship or indicate none (add rows as needed) | Specifications/Comments (e.g., if payments were made to you or to your institution) |
|-----------------------------------------------------------|--------------------------------------------------------------------------------------------------------------------------------------------------------------------------------|----------------------------------------------------------------------------------------------|-------------------------------------------------------------------------------------|
| <b>Time frame: Since the initial planning of the work</b> |                                                                                                                                                                                |                                                                                              |                                                                                     |
| 1                                                         | All support for the present manuscript (e.g., funding, provision of study materials, medical writing, article processing charges, etc.)<br><b>No time limit for this item.</b> | <u>X</u> None                                                                                |                                                                                     |
|                                                           |                                                                                                                                                                                |                                                                                              |                                                                                     |
|                                                           |                                                                                                                                                                                |                                                                                              |                                                                                     |
|                                                           |                                                                                                                                                                                |                                                                                              |                                                                                     |
|                                                           |                                                                                                                                                                                |                                                                                              |                                                                                     |
|                                                           |                                                                                                                                                                                |                                                                                              |                                                                                     |
| <b>Time frame: past 36 months</b>                         |                                                                                                                                                                                |                                                                                              |                                                                                     |
| 2                                                         | Grants or contracts from any entity (if not indicated in item #1 above).                                                                                                       | <u>X</u> None                                                                                |                                                                                     |
|                                                           |                                                                                                                                                                                |                                                                                              |                                                                                     |
| 3                                                         | Royalties or licenses                                                                                                                                                          | <u>X</u> None                                                                                |                                                                                     |
|                                                           |                                                                                                                                                                                |                                                                                              |                                                                                     |
| 4                                                         | Consulting fees                                                                                                                                                                | <u>X</u> None                                                                                |                                                                                     |
|                                                           |                                                                                                                                                                                |                                                                                              |                                                                                     |
|                                                           |                                                                                                                                                                                |                                                                                              |                                                                                     |

|    |                                                                                                              |               |  |
|----|--------------------------------------------------------------------------------------------------------------|---------------|--|
| 5  | Payment or honoraria for lectures, presentations, speakers bureaus, manuscript writing or educational events | <u>X</u> None |  |
| 6  | Payment for expert testimony                                                                                 | <u>X</u> None |  |
| 7  | Support for attending meetings and/or travel                                                                 | <u>X</u> None |  |
| 8  | Patents planned, issued or pending                                                                           | <u>X</u> None |  |
| 9  | Participation on a Data Safety Monitoring Board or Advisory Board                                            | <u>X</u> None |  |
| 10 | Leadership or fiduciary role in other board, society, committee or advocacy group, paid or unpaid            | <u>X</u> None |  |
| 11 | Stock or stock options                                                                                       | <u>X</u> None |  |
| 12 | Receipt of equipment, materials, drugs, medical writing, gifts or other services                             | <u>X</u> None |  |
| 13 | Other financial or non-financial interests                                                                   | <u>X</u> None |  |

Please summarize the above conflict of interest in the following box:

None.

Please place an "X" next to the following statement to indicate your agreement:

X I certify that I have answered every question and have not altered the wording of any of the questions on this form.



## ICMJE DISCLOSURE FORM

Date: 2021.7.1  
 Your Name: Kexiong Dong  
 Manuscript Title: Detection of hypomimia in patients with Parkinson's disease via smile videos  
 Manuscript number (if known): \_\_\_\_\_

In the interest of transparency, we ask you to disclose all relationships/activities/interests listed below that are related to the content of your manuscript. "Related" means any relation with for-profit or not-for-profit third parties whose interests may be affected by the content of the manuscript. Disclosure represents a commitment to transparency and does not necessarily indicate a bias. If you are in doubt about whether to list a relationship/activity/interest, it is preferable that you do so.

The following questions apply to the author's relationships/activities/interests as they relate to the current manuscript only.

The author's relationships/activities/interests should be defined broadly. For example, if your manuscript pertains to the epidemiology of hypertension, you should declare all relationships with manufacturers of antihypertensive medication, even if that medication is not mentioned in the manuscript.

In item #1 below, report all support for the work reported in this manuscript without time limit. For all other items, the time frame for disclosure is the past 36 months.

|                                                           |                                                                                                                                                                                | Name all entities with whom you have this relationship or indicate none (add rows as needed) | Specifications/Comments (e.g., if payments were made to you or to your institution) |
|-----------------------------------------------------------|--------------------------------------------------------------------------------------------------------------------------------------------------------------------------------|----------------------------------------------------------------------------------------------|-------------------------------------------------------------------------------------|
| <b>Time frame: Since the initial planning of the work</b> |                                                                                                                                                                                |                                                                                              |                                                                                     |
| 1                                                         | All support for the present manuscript (e.g., funding, provision of study materials, medical writing, article processing charges, etc.)<br><b>No time limit for this item.</b> | <u>X</u> None                                                                                |                                                                                     |
|                                                           |                                                                                                                                                                                |                                                                                              |                                                                                     |
|                                                           |                                                                                                                                                                                |                                                                                              |                                                                                     |
|                                                           |                                                                                                                                                                                |                                                                                              |                                                                                     |
|                                                           |                                                                                                                                                                                |                                                                                              |                                                                                     |
|                                                           |                                                                                                                                                                                |                                                                                              |                                                                                     |
| <b>Time frame: past 36 months</b>                         |                                                                                                                                                                                |                                                                                              |                                                                                     |
| 2                                                         | Grants or contracts from any entity (if not indicated in item #1 above).                                                                                                       | <u>X</u> None                                                                                |                                                                                     |
|                                                           |                                                                                                                                                                                |                                                                                              |                                                                                     |
| 3                                                         | Royalties or licenses                                                                                                                                                          | <u>X</u> None                                                                                |                                                                                     |
|                                                           |                                                                                                                                                                                |                                                                                              |                                                                                     |
| 4                                                         | Consulting fees                                                                                                                                                                | <u>X</u> None                                                                                |                                                                                     |
|                                                           |                                                                                                                                                                                |                                                                                              |                                                                                     |

|    |                                                                                                              |                                                                                                                                                   |  |
|----|--------------------------------------------------------------------------------------------------------------|---------------------------------------------------------------------------------------------------------------------------------------------------|--|
| 5  | Payment or honoraria for lectures, presentations, speakers bureaus, manuscript writing or educational events | <u>X</u> None                                                                                                                                     |  |
| 6  | Payment for expert testimony                                                                                 | <u>X</u> None                                                                                                                                     |  |
| 7  | Support for attending meetings and/or travel                                                                 | <u>X</u> None                                                                                                                                     |  |
| 8  | Patents planned, issued or pending                                                                           | <u>X</u> None                                                                                                                                     |  |
| 9  | Participation on a Data Safety Monitoring Board or Advisory Board                                            | <u>X</u> None                                                                                                                                     |  |
| 10 | Leadership or fiduciary role in other board, society, committee or advocacy group, paid or unpaid            | The author is employed by Technical Department in Hangzhou Healink Technology Corporation Limited, which located at 188 Liyi Rd, Hangzhou, China. |  |
| 11 | Stock or stock options                                                                                       | <u>X</u> None                                                                                                                                     |  |
| 12 | Receipt of equipment, materials, drugs, medical writing, gifts or other services                             | <u>X</u> None                                                                                                                                     |  |
| 13 | Other financial or non-financial interests                                                                   | <u>X</u> None                                                                                                                                     |  |

**Please summarize the above conflict of interest in the following box:**

The author is employed by Technical Department in Hangzhou Healink Technology Corporation Limited, which located at 188 Liyi Rd, Hangzhou, China.

**Please place an "X" next to the following statement to indicate your agreement:**

X I certify that I have answered every question and have not altered the wording of any of the questions on this form.
